# Supplementary material for: Foliar Infiltration of Virus-Derived Small Hairpin RNAs Triggers the RNAi Mechanism against the Cucumber Mosaic Virus
Source: MDPI journal article supplement (doi:10.3390/ijms23094938), 2022-04-29

**Figure S1:** Bio-assays design. **Bio-assay 1:** Three biological replicates for each treatment. **Bio-assay 2:** Three (RT-qPCR) and six (ELISA) biological replicates for each treatment.

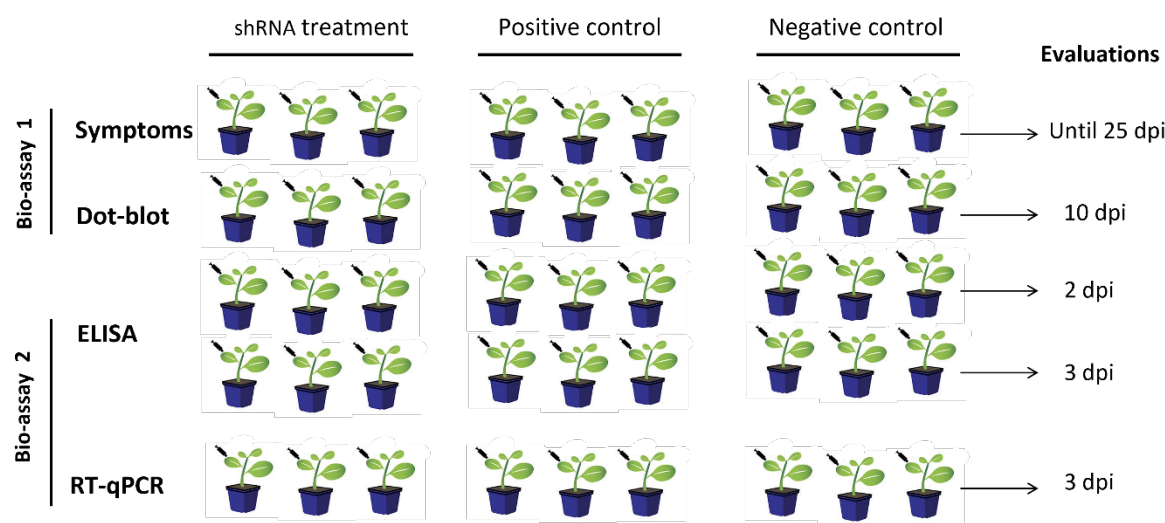

Supplement: s1 [file s1]
